# Supplementary material for: N-Acetylcysteine inhalation improves pulmonary function in patients received liver transplantation
Source: PubMed Central journal article supplement (PMC6165840; doi:10.1042/bsr20180858), 2018-09-28
Supplement: bsr20180858_Supp1.pdf [file bsr20180858_Supp1.pdf]

**Supplementary TABLE 1.**

**The Melbourne Group Scale Version 2 (Criteria for Diagnosis of a Postoperative Pulmonary Complication)**

---

Diagnosis confirmed when four or more of the following are present:

---

- Chest radiograph report of consolidation/collapse
  - Raised temperature  $> 38^{\circ}\text{C}$  on two or more consecutive days
  - Pulse oximetry saturation of oxygen ( $\text{SpO}_2$ )  $< 90\%$  on room air on two consecutive days
  - Production of yellow or green sputum which is different to preoperative assessment
  - An otherwise unexplained white cell count  $> 11 \times 10^9 \text{ L}^{-1}$  or prescription of an antibiotic specific for respiratory infection
  - Physician diagnosis of chest infection
  - Presence of infection on sputum culture report
  - Abnormal breath sounds on auscultation which differ from preoperative assessment
-

## Supplementary TABLE 2.

### Definitions of Postoperative Pulmonary Complications

---

Diagnosis confirmed by two independent doctors:

---

#### **Acute lung injury**

Acute onset of hypoxemia (partial pressure of oxygen in arterial blood [PaO<sub>2</sub>]/fraction of inspired oxygen [FIO<sub>2</sub>] ≤ 300 mmHg) with new bilateral infiltrates in the setting of either a normal pulmonary arterial wedge pressure (PAWP ≤ 18 mmHg) or the absence of suspected of left atrial hypertension when PAWP is not available.

#### **Acute respiratory distress syndrome (ARDS)**

ARDS is a special type of acute lung injury. In the setting of more severe hypoxemia (PaO<sub>2</sub>/FIO<sub>2</sub> ≤ 200 mmHg), the term ARDS is applied.

#### **Pleural effusion**

Chest radiograph demonstrating blunting of the costophrenic angle, evidence of displacement of adjacent anatomical structures, or (in supine position) a hazy opacity in one hemithorax, with preserved vascular shadows.

#### **Atelectasis**

Collapse of the alveoli, lung opacification with shift of the mediastinum, hilum, or hemidiaphragm toward the affected area, and compensatory overinflation in the adjacent nonatelectatic lung.

---
